# Supplementary material for: Variations for Fusarium head blight resistance associated with genomic diversity in different sources of the resistant wheat cultivar ‘Sumai 3’
Source: PubMed Central journal article supplement — Breed Sci. 2014 May;64(1):90–6. doi: 10.1270/jsbbs.64.90 (PMC4031114; doi:10.1270/jsbbs.64.90), 2014-05
Supplement: 64_90_1.pdf [file 64_90_1.pdf]

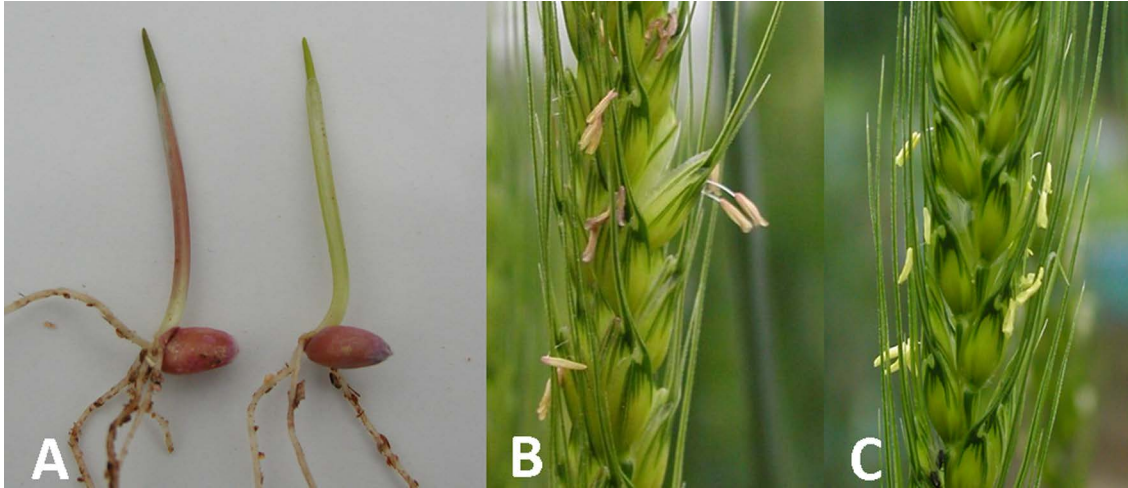

**Supplemental Fig. 1.** Morphological variation within Sumai 3-JPN. (A) The color of the coleoptile differed between Sumai 3-JPNp (left) and Sumai 3-JPNy (right). (B) Anther color in Sumai 3-JPNp. (C) Anther color in Sumai 3-JPNy.
